# Supplementary material for: Metastatic Death Based on Presenting Features and Treatment for Advanced Intraocular Retinoblastoma: A Multicenter Registry-Based Study
Source: PubMed Central journal article supplement (PMC9329221; doi:10.1016/j.ophtha.2022.04.022), 2022-04-30
Supplement: NIHMS1816535-supplement-sup_fig_2.pdf [file NIHMS1816535-supplement-sup_fig_2.pdf]

### Cumulative Survival of Advanced Retinoblastoma Patients Based on Treatment Modalities and Tumor Laterality

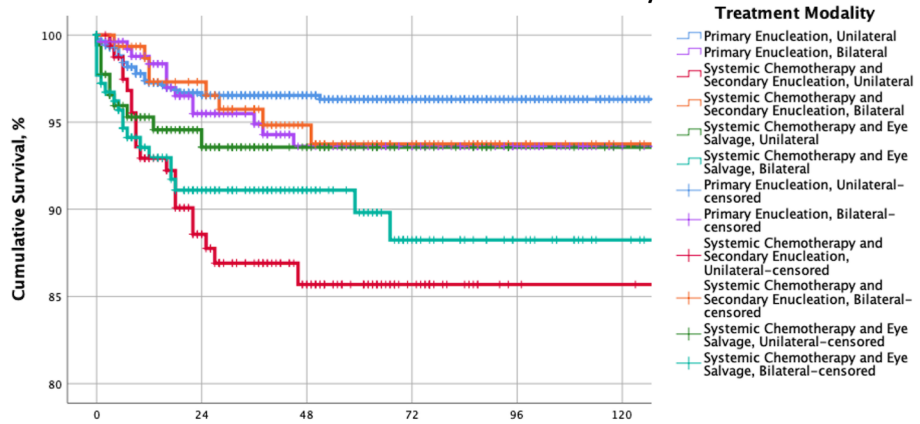

| Numbers at risk                               |            | Duration in Months |     |     |     |     |     |  |
|-----------------------------------------------|------------|--------------------|-----|-----|-----|-----|-----|--|
|                                               |            | 0                  | 24  | 48  | 72  | 96  | 120 |  |
| Primary Enucleation                           | Unilateral | 870                | 627 | 446 | 290 | 167 | 79  |  |
|                                               | Bilateral  | 258                | 183 | 137 | 98  | 56  | 24  |  |
| Systemic Chemotherapy & secondary enucleation | Unilateral | 161                | 111 | 68  | 29  | 10  | 9   |  |
|                                               | Bilateral  | 154                | 127 | 87  | 54  | 27  | 17  |  |
| Systemic Chemotherapy and eye salvage         | Unilateral | 180                | 95  | 48  | 23  | 10  | 7   |  |
|                                               | Bilateral  | 218                | 130 | 82  | 46  | 30  | 18  |  |
