# Supplementary material for: Metastatic Death Based on Presenting Features and Treatment for Advanced Intraocular Retinoblastoma: A Multicenter Registry-Based Study
Source: PubMed Central journal article supplement (PMC9329221; doi:10.1016/j.ophtha.2022.04.022), 2022-04-30

## Cumulative Survival of Advanced Retinoblastoma Patients Based on AJCC Clinical T Sub-category

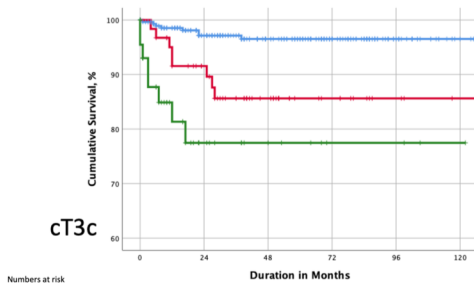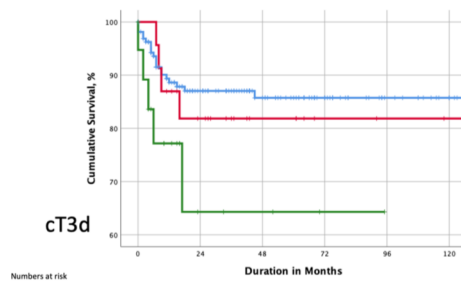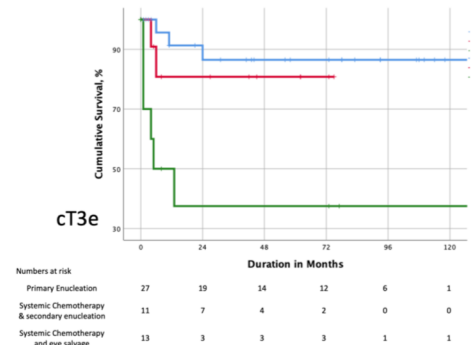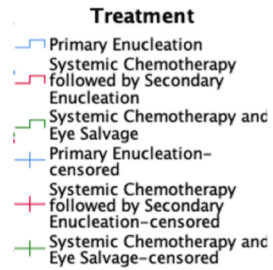

Supplement: NIHMS1816535-supplement-sup_fig_4.pdf [file NIHMS1816535-supplement-sup_fig_4.pdf]
