# Supplementary material for: Metastatic Death Based on Presenting Features and Treatment for Advanced Intraocular Retinoblastoma: A Multicenter Registry-Based Study
Source: PubMed Central journal article supplement (PMC9329221; doi:10.1016/j.ophtha.2022.04.022), 2022-04-30
Supplement: NIHMS1816535-supplement-sup_tab_1.pdf [file NIHMS1816535-supplement-sup_tab_1.pdf]

**Supplementary Table 1: Patient-level (Worse Eye) Tumor Laterality in 1841 Patients with Retinoblastoma and Treatment Modality**

|                    |                                                         |                      | Tumor Laterality |           | Total  |
|--------------------|---------------------------------------------------------|----------------------|------------------|-----------|--------|
|                    |                                                         |                      | Unilateral       | Bilateral |        |
| Treatment Modality | Primary Enucleation                                     | Count                | 870              | 258       | 1128   |
|                    |                                                         | % Treatment Modality | 77.1%            | 22.9%     | 100.0% |
|                    |                                                         | % Laterality         | 71.8%            | 41.0%     | 61.3%  |
|                    |                                                         | % Total              | 47.3%            | 14.0%     | 61.3%  |
|                    | Systemic Chemotherapy followed by secondary enucleation | Count                | 161              | 154       | 315    |
|                    |                                                         | % Treatment Modality | 51.1%            | 48.9%     | 100.0% |
|                    |                                                         | % Laterality         | 13.3%            | 24.4%     | 17.1%  |
|                    |                                                         | % Total              | 8.7%             | 8.4%      | 17.1%  |
|                    | Systemic Chemotherapy and eye salvage                   | Count                | 180              | 218       | 398    |
|                    |                                                         | % Treatment Modality | 45.2%            | 54.8%     | 100.0% |
|                    |                                                         | % Laterality         | 14.9%            | 34.6%     | 21.6%  |
|                    |                                                         | % Total              | 9.8%             | 11.8%     | 21.6%  |
| Total              |                                                         | Count                | 1211             | 630       | 1841   |
|                    |                                                         | % Total              | 65.8%            | 34.2%     | 100.0% |

A chi-square test was performed to examine the relation between tumor laterality and preferred treatment modality. The relation between these variables was significant,  $\chi(2) = 169.334$ ,  $p = <0.001$ . Unilateral advanced RB are more likely to be primarily enucleated than bilateral tumors.

AJCC: American Joint Committee on Cancer; OOTF: Ophthalmic Oncology Task Force
