# Supplementary material for: Metastatic Death Based on Presenting Features and Treatment for Advanced Intraocular Retinoblastoma: A Multicenter Registry-Based Study
Source: PubMed Central journal article supplement (PMC9329221; doi:10.1016/j.ophtha.2022.04.022), 2022-04-30
Supplement: NIHMS1816535-supplement-sup_tab_2.pdf [file NIHMS1816535-supplement-sup_tab_2.pdf]

**Supplementary Table 2: Kaplan-Meier Cumulative Proportion of Surviving without Metastatic Death according to 8<sup>th</sup> Edition AJCC Clinical cT subcategory and Treatment Modality**

**cT2a (N=196)**

| Variable                    |                              | Kaplan-Meier Point Estimates (95% CI), % |             |             |
|-----------------------------|------------------------------|------------------------------------------|-------------|-------------|
|                             |                              | 1 year                                   | 5 year      | 10 year     |
| Primary Enucleation (n=110) |                              | 100                                      | 100         | 100         |
| Systemic Chemotherapy       | Secondary Enucleation (n=32) | 94 (90-98)                               | 94 (90-98)  | 94 (90-98)  |
|                             | Eye Salvage (n=54)           | 100                                      | 93 (86-100) | 93 (86-100) |

Overall Comparison p= 0.013

Pairwise comparisons [Log Rank]

|                                                         | Primary Enucleation | Systemic Chemotherapy followed by secondary enucleation | Systemic Chemotherapy and eye salvage |
|---------------------------------------------------------|---------------------|---------------------------------------------------------|---------------------------------------|
| Primary Enucleation                                     |                     | 0.009*                                                  | 0.047                                 |
| Systemic Chemotherapy followed by secondary enucleation |                     |                                                         | 0.354                                 |

\* Significant after adjustment for multiple comparisons according to Bonferroni

**cT2b (N=814)**

| Variable                    |                               | Kaplan-Meier Point Estimates (95% CI), % |            |            |
|-----------------------------|-------------------------------|------------------------------------------|------------|------------|
|                             |                               | 1 year                                   | 5 year     | 10 year    |
| Primary Enucleation (n=410) |                               | 99 (98-100)                              | 98 (97-99) | 98 (97-99) |
| Systemic Chemotherapy       | Secondary Enucleation (n=164) | 98 (97-99)                               | 93 (91-95) | 93 (91-95) |
|                             | Eye Salvage (n=240)           | 97 (96-98)                               | 96 (94-98) | 96 (94-98) |

Overall Comparison p= 0.025

Pairwise comparisons [Log Rank]

|  | Primary Enucleation | Systemic Chemotherapy followed by | Systemic Chemotherapy and eye salvage |
|--|---------------------|-----------------------------------|---------------------------------------|
|  |                     |                                   |                                       |

|                                                         |  |                       |       |
|---------------------------------------------------------|--|-----------------------|-------|
|                                                         |  | secondary enucleation |       |
| Primary Enucleation                                     |  | 0.005*                | 0.056 |
| Systemic Chemotherapy followed by secondary enucleation |  |                       | 0.472 |

\* Significant after adjustment for multiple comparisons according to Bonferroni

### cT3a (Phthisis, N=22)

| Variable                   |                             | Kaplan-Meier Point Estimates (95% CI), % |            |         |
|----------------------------|-----------------------------|------------------------------------------|------------|---------|
|                            |                             | 1 year                                   | 5 year     | 10 year |
| Primary Enucleation (n=13) |                             | 91 (83-99)                               | 91 (83-99) | N/A     |
| Systemic Chemotherapy      | Secondary Enucleation (n=5) | 100                                      | 100        | N/A     |
|                            | Eye Salvage (n=4)           | 100                                      | N/A        | N/A     |

Overall Comparison p=0.382

### cT3b (Anterior chamber involvement, N=166)

| Variable                    |                              | Kaplan-Meier Point Estimates (95% CI), % |            |            |
|-----------------------------|------------------------------|------------------------------------------|------------|------------|
|                             |                              | 1 year                                   | 5 year     | 10 year    |
| Primary Enucleation (n=123) |                              | 97 (95-99)                               | 97 (95-99) | 97 (95-99) |
| Systemic Chemotherapy       | Secondary Enucleation (n=19) | 80 (70-90)                               | 80 (70-90) | 80 (70-90) |
|                             | Eye Salvage (n=24)           | 100                                      | 100        | Data N/A   |

Overall Comparison p=0.029

### Pairwise comparisons [Log Rank]

|                                                         | Primary Enucleation | Systemic Chemotherapy followed by secondary enucleation | Systemic Chemotherapy and eye salvage |
|---------------------------------------------------------|---------------------|---------------------------------------------------------|---------------------------------------|
| Primary Enucleation                                     |                     | 0.017*                                                  | 0.632                                 |
| Systemic Chemotherapy followed by secondary enucleation |                     |                                                         | 0.264                                 |

\* Significant after adjustment for multiple comparisons according to Bonferroni

### cT3c (Glaucoma, N=389)

| Variable                    |                              | Kaplan-Meier Point Estimates (95% CI), % |            |            |
|-----------------------------|------------------------------|------------------------------------------|------------|------------|
|                             |                              | 1 year                                   | 5 year     | 10 year    |
| Primary Enucleation (n=284) |                              | 97 (96-98)                               | 97 (96-98) | 97 (96-98) |
| Systemic Chemotherapy       | Secondary Enucleation (n=61) | 91 (87-93)                               | 85 (80-90) | 85 (80-90) |
|                             | Eye Salvage (n=44)           | 75 (67-83)                               | 75 (67-83) | 75 (67-83) |

Overall Comparison p<0.001

Pairwise comparisons [Log Rank]

|                                                         | Primary Enucleation | Systemic Chemotherapy followed by secondary enucleation | Systemic Chemotherapy and eye salvage |
|---------------------------------------------------------|---------------------|---------------------------------------------------------|---------------------------------------|
| Primary Enucleation                                     |                     | 0.001*                                                  | P<0.001*                              |
| Systemic Chemotherapy followed by secondary enucleation |                     |                                                         | 0.126                                 |

\* Significant after adjustment for multiple comparisons according to Bonferroni

### cT3d (Intraocular hemorrhage, N=203)

| Variable                    |                              | Kaplan-Meier Point Estimates (95% CI), % |            |            |
|-----------------------------|------------------------------|------------------------------------------|------------|------------|
|                             |                              | 1 year                                   | 5 year     | 10 year    |
| Primary Enucleation (n=161) |                              | 87 (84-90)                               | 86 (83-89) | 86 (83-89) |
| Systemic Chemotherapy       | Secondary Enucleation (n=23) | 82 (74-88)                               | 82 (74-88) | 82 (74-88) |
|                             | Eye Salvage (n=19)           | 66 (53-79)                               | 66 (53-79) | N/A        |

Overall Comparison p=0.147

### cT3e (Orbital cellulitis, N=51)

| Variable                   |                              | Kaplan-Meier Point Estimates (95% CI), % |            |            |
|----------------------------|------------------------------|------------------------------------------|------------|------------|
|                            |                              | 1 year                                   | 5 year     | 10 year    |
| Primary Enucleation (n=27) |                              | 92 (86-98)                               | 87 (80-94) | 87 (80-94) |
| Systemic Chemotherapy      | Secondary Enucleation (n=11) | 80 (67-93)                               | 80 (67-93) | NA         |
|                            | Eye Salvage (n=13)           | 41 (25-57)                               | 41 (25-57) | 41 (25-57) |

Overall Comparison p=0.004

Pairwise comparisons [Log Rank]

|                                                                     | Primary Enucleation | Systemic<br>Chemotherapy<br>followed by<br>secondary<br>enucleation | Systemic<br>Chemotherapy and<br>eye salvage |
|---------------------------------------------------------------------|---------------------|---------------------------------------------------------------------|---------------------------------------------|
| Primary Enucleation                                                 |                     | 0.537                                                               | 0.001*                                      |
| Systemic<br>Chemotherapy<br>followed by<br>secondary<br>enucleation |                     |                                                                     | 0.045                                       |

\* Significant after adjustment for multiple comparisons according to Bonferroni

AJCC: American Joint Committee on Cancer; CI: Confidence Interval
