# Supplementary material for: Metastatic Death Based on Presenting Features and Treatment for Advanced Intraocular Retinoblastoma: A Multicenter Registry-Based Study
Source: PubMed Central journal article supplement (PMC9329221; doi:10.1016/j.ophtha.2022.04.022), 2022-04-30
Supplement: NIHMS1816535-supplement-sup_tab_3.pdf [file NIHMS1816535-supplement-sup_tab_3.pdf]

**Supplementary Table 3: Kaplan-Meier Cumulative Proportion of Surviving without Metastatic Death for AJCC-OOTF Size Groups in 1416 Patients with Retinoblastoma**

| Size Group | Variable                            | Laterality           | Kaplan-Meier estimates, % (95% Confidence Interval) |            |            |
|------------|-------------------------------------|----------------------|-----------------------------------------------------|------------|------------|
|            |                                     |                      | 1 year                                              | 5 year     | 10 year    |
| 1          | < 50% globe involved                | Unilateral<br>n= 216 | 100                                                 | 100        | 100        |
|            |                                     | Bilateral<br>n= 73   | 100                                                 | 96 (93-99) | 96 (93-99) |
| 2          | > 50% and < 2/3 globe involved      | Unilateral<br>n= 262 | 98 (97-99)                                          | 97 (96-98) | 97 (96-98) |
|            |                                     | Bilateral<br>n= 57   | 98 (96-100)                                         | 93 (89-97) | 93 (89-97) |
| 3          | > 2/3 of globe involved             | Unilateral<br>n= 549 | 96 (95-97)                                          | 94 (93-95) | 94 (93-95) |
|            |                                     | Bilateral<br>n= 127  | 95 (93-97)                                          | 92 (89-95) | 92 (89-95) |
| 4          | diffuse infiltrating retinoblastoma | Unilateral<br>n= 99  | 88 (85-91)                                          | 86 (82-90) | 86 (82-90) |
|            |                                     | Bilateral<br>n= 33   | 73 (65-81)                                          | 73 (65-81) | 73 (65-81) |

Overall comparison:  $p < 0.001$

**Pairwise comparisons [Log Rank test]**

| Size Group | Unilateral vs Bilateral |
|------------|-------------------------|
| 1          | 0.027                   |
| 2          | 0.227                   |
| 3          | 0.908                   |
| 4          | 0.072                   |

AJCC: American Joint Committee on Cancer; OOTF: Ophthalmic Oncology Task Force
