# Supplementary material for: Metastatic Death Based on Presenting Features and Treatment for Advanced Intraocular Retinoblastoma: A Multicenter Registry-Based Study
Source: PubMed Central journal article supplement (PMC9329221; doi:10.1016/j.ophtha.2022.04.022), 2022-04-30
Supplement: NIHMS1816535-supplement-sup_tab_4.pdf [file NIHMS1816535-supplement-sup_tab_4.pdf]

**Supplementary Table 4: Kaplan-Meier Cumulative Proportion of Surviving without Metastatic Death for AJCC-OOTF Size Groups and Treatment Modality in Patients with Retinoblastoma**

**Primary Enucleation (N=930)**

| Variable    |                                     | Kaplan-Meier estimates, % (95% Confidence Interval) |             |             |
|-------------|-------------------------------------|-----------------------------------------------------|-------------|-------------|
| Size Group  |                                     | 1 year                                              | 5 year      | 10 year     |
| 1<br>n= 141 | < 50% globe involved                | 100                                                 | 100         | 100         |
| 2<br>n= 175 | > 50% and < 2/3 globe involved      | 99 (98-100)                                         | 99 (98-100) | 99 (98-100) |
| 3<br>n= 507 | > 2/3 of globe involved             | 97 (96-98)                                          | 97 (96-98)  | 97 (96-98)  |
| 4<br>n= 107 | diffuse infiltrating retinoblastoma | 88 (85-91)                                          | 87 (84-90)  | 87 (84-90)  |

Overall comparison:  $p < 0.001$

**Pairwise comparisons [Log Rank test]**

| Size Group | 2     | 3     | 4       |
|------------|-------|-------|---------|
| 1          | 0.219 | 0.047 | <0.001* |
| 2          |       | 0.190 | <0.001* |
| 3          |       |       | <0.001* |

\* Significant after adjustment for multiple comparisons according to Bonferroni

**Systemic Chemotherapy followed by Secondary Enucleation (N= 216)**

| Variable   |                                           | Kaplan-Meier estimates, % (95% Confidence Interval) |             |             |
|------------|-------------------------------------------|-----------------------------------------------------|-------------|-------------|
| Size Group |                                           | 1 year                                              | 5 year      | 10 year     |
| 1<br>n= 57 | < 50% globe<br>involved                   | 100                                                 | 97 (94-100) | 97 (94-100) |
| 2<br>n= 55 | > 50% and <<br>2/3 globe<br>involved      | 92 (88-96)                                          | 86 (81-91)  | 86 (81-91)  |
| 3<br>n= 96 | > 2/3 of globe<br>involved                | 90 (87-93)                                          | 87 (83-91)  | 87 (83-91)  |
| 4<br>n= 8  | diffuse<br>infiltrating<br>retinoblastoma | 86 (73-99)                                          | 86 (73-99)  | N/A         |

Overall comparison: p=0.114

**Systemic Chemotherapy and Eye Salvage (N= 270)**

| Variable   |                                      | Kaplan-Meier estimates, % (95% Confidence Interval) |             |             |
|------------|--------------------------------------|-----------------------------------------------------|-------------|-------------|
| Size Group |                                      | 1 year                                              | 5 year      | 10 year     |
| 1<br>n= 91 | < 50% globe<br>involved              | 100                                                 | 98 (96-100) | 98 (96-100) |
| 2<br>n= 89 | > 50% and <<br>2/3 globe<br>involved | 99 (98-100)                                         | 99 (98-100) | 99 (98-100) |
| 3<br>n= 73 | > 2/3 of globe<br>involved           | 87 (83-91)                                          | 76 (65-87)  | N/A         |

|            |                                           |            |            |            |
|------------|-------------------------------------------|------------|------------|------------|
| 4<br>n= 17 | diffuse<br>infiltrating<br>retinoblastoma | 52 (37-67) | 52 (37-67) | 52 (37-67) |
|------------|-------------------------------------------|------------|------------|------------|

Overall comparison:  $p < 0.001$

**Pairwise comparisons [Log Rank test]**

| Size Group | 2     | 3      | 4       |
|------------|-------|--------|---------|
| 1          | 0.770 | 0.001* | <0.001* |
| 2          |       | 0.003* | <0.001* |
| 3          |       |        | 0.011   |

\* Significant after adjustment for multiple comparisons according to Bonferroni

AJCC: American Joint Committee on Cancer; OOTF: Ophthalmic Oncology Task Force
