# Supplementary material for: Metastatic Death Based on Presenting Features and Treatment for Advanced Intraocular Retinoblastoma: A Multicenter Registry-Based Study
Source: PubMed Central journal article supplement (PMC9329221; doi:10.1016/j.ophtha.2022.04.022), 2022-04-30
Supplement: NIHMS1816535-supplement-supp_fig_5.pdf [file NIHMS1816535-supplement-supp_fig_5.pdf]

### Cumulative Survival of Advanced Retinoblastoma Patients Based on AJCC OOTF Size Groups and Tumor Laterality

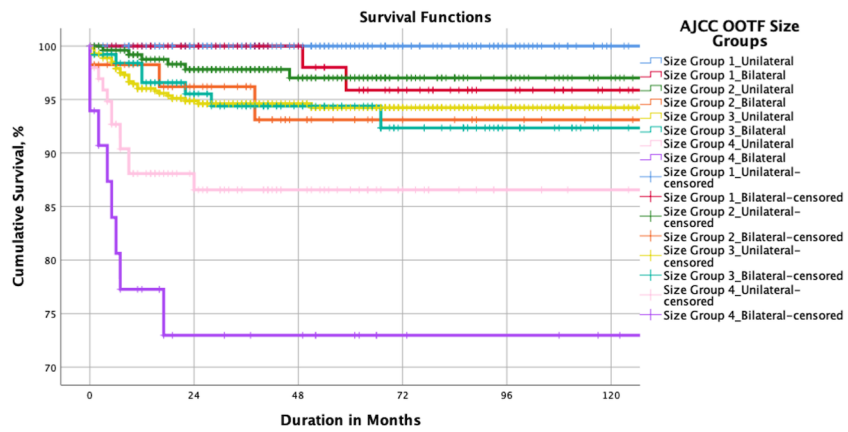

| Numbers at risk |            | Duration in Months |     |     |     |    |     |
|-----------------|------------|--------------------|-----|-----|-----|----|-----|
|                 |            | 0                  | 24  | 48  | 72  | 96 | 120 |
| Size Group 1    | Unilateral | 216                | 159 | 111 | 75  | 44 | 24  |
|                 | Bilateral  | 73                 | 62  | 51  | 37  | 25 | 16  |
| Size Group 2    | Unilateral | 262                | 192 | 122 | 69  | 41 | 24  |
|                 | Bilateral  | 57                 | 40  | 22  | 14  | 10 | 7   |
| Size Group 3    | Unilateral | 549                | 376 | 266 | 161 | 84 | 36  |
|                 | Bilateral  | 127                | 89  | 60  | 37  | 17 | 5   |
| Size Group 4    | Unilateral | 99                 | 58  | 34  | 19  | 10 | 6   |
|                 | Bilateral  | 33                 | 15  | 13  | 6   | 5  | 3   |
