# Supplementary material for: Metastatic Death Based on Presenting Features and Treatment for Advanced Intraocular Retinoblastoma: A Multicenter Registry-Based Study
Source: PubMed Central journal article supplement (PMC9329221; doi:10.1016/j.ophtha.2022.04.022), 2022-04-30
Supplement: NIHMS1816535-supplement-supp_fig_6.pdf [file NIHMS1816535-supplement-supp_fig_6.pdf]

Cumulative Survival of Advanced Retinoblastoma Patients Based on AJCC-OOTF Size Groups and Treatment Modalities

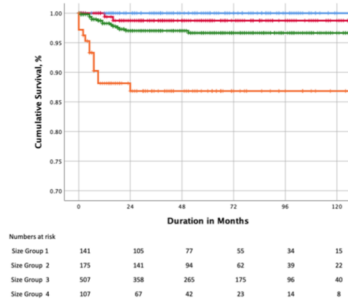

Primary Enucleation

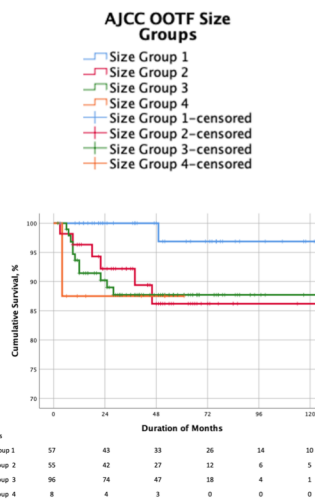

Systemic Chemotherapy & Secondary Enucleation

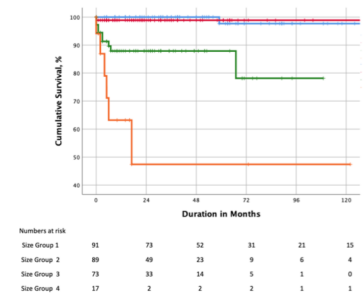

Systemic Chemotherapy and Eye Salvage
